# Supplementary material
Source: PubMed Central journal article supplement (PMC8428598)
Supplement: JCOPDF-8-336-s001.pdf [file JCOPDF-8-336-s001.pdf]

Supplementary Table 1. COPD Guidelines and Diagnosis<sup>†</sup>

| Question                                                                                             | Total Cohort   | Provider Degree |               |         | Practice Location |               |               |         |
|------------------------------------------------------------------------------------------------------|----------------|-----------------|---------------|---------|-------------------|---------------|---------------|---------|
|                                                                                                      |                | MD/DO           | APP           | p-value | Colorado          | Kansas        | Other States  | p-value |
|                                                                                                      | N=71<br>(100%) | N=36<br>(51%)   | N=35<br>(49%) |         | N=35<br>(49%)     | N=17<br>(24%) | N=19<br>(27%) |         |
| <b>Which guidelines do you use to diagnose and manage COPD?</b>                                      |                |                 |               | 0.38    |                   |               |               | 0.17    |
| GOLD or ATS/ERS                                                                                      | 43 (61)        | 20 (56)         | 23 (66)       |         | 22 (63)           | 12 (71)       | 9 (47)        |         |
| I use them, but can't remember the name; I don't use any; I did not know there were any; I use NAEPP | 28 (39)        | 16 (44)         | 12 (34)       |         | 13 (37)           | 5 (29)        | 10 (53)       |         |
| <b>What barriers do you see in the diagnosis of COPD?</b>                                            |                |                 |               |         |                   |               |               |         |
| Lack of specific COPD symptoms                                                                       | 10 (14)        | 3 (8)           | 7 (20)        | 0.19*   | 7 (20)            | 2 (12)        | 1 (5)         | 0.27*   |
| Patient failure to recognize and report symptoms                                                     | 37 (52)        | 21 (58)         | 16 (46)       | 0.29    | 19 (54)           | 9 (53)        | 9 (47)        | 0.63    |
| COPD patients have multiple chronic conditions                                                       | 47 (66)        | 29 (81)         | 18 (51)       | 0.01    | 22 (63)           | 13 (76)       | 12 (63)       | 0.74    |
| Lack of knowledge/training in COPD diagnosis                                                         | 9 (13)         | 2 (6)           | 7 (20)        | 0.08*   | 3 (9)             | 3 (18)        | 3 (16)        | 0.69*   |
| Lack of easy access to spirometry                                                                    | 21 (30)        | 10 (28)         | 11 (31)       | 0.74    | 8 (23)            | 7 (41)        | 6 (32)        | 0.82    |
| Lack of effective treatments                                                                         | 3 (4)          | 3 (8)           | 0 (0)         | 0.24*   | 2 (6)             | 1 (6)         | 0 (0)         | 0.56*   |
| Other                                                                                                | 7 (10)         | 1 (3)           | 6 (17)        | 0.06*   | 5 (14)            | 0 (0)         | 2 (11)        | >.99*   |
| <b>What do you use to make a diagnosis of COPD?</b>                                                  |                |                 |               |         |                   |               |               |         |
| Smoking history                                                                                      | 47 (66)        | 26 (72)         | 21 (60)       | 0.28    | 24 (69)           | 10 (59)       | 13 (68)       | 0.81    |
| Smoker's cough                                                                                       | 20 (28)        | 10 (28)         | 10 (29)       | 0.94    | 12 (34)           | 2 (12)        | 6 (32)        | 0.70    |
| Dyspnea with activity                                                                                | 44 (62)        | 27 (75)         | 17 (49)       | 0.02    | 24 (69)           | 8 (47)        | 12 (63)       | 0.90    |
| Dyspnea at rest                                                                                      | 38 (54)        | 23 (64)         | 15 (43)       | 0.08    | 21 (60)           | 8 (47)        | 9 (47)        | 0.53    |
| Spirometry                                                                                           | 63 (89)        | 32 (89)         | 31 (89)       | >.99*   | 34 (97)           | 15 (88)       | 14 (74)       | 0.03*   |
| <b>What diagnostic tests do you perform if you suspect COPD?</b>                                     |                |                 |               |         |                   |               |               |         |
| Refer to a specialist                                                                                | 8 (11)         | 2 (6)           | 6 (17)        | 0.15*   | 2 (6)             | 4 (24)        | 2 (11)        | >.99*   |
| Chest X-ray                                                                                          | 53 (75)        | 25 (69)         | 28 (80)       | 0.31    | 25 (71)           | 12 (71)       | 16 (84)       | 0.36*   |
| Spirometry                                                                                           | 62 (89)        | 34 (94)         | 29 (83)       | 0.15    | 33 (94)           | 15 (88)       | 15 (79)       | 0.20*   |
| Trial of inhaled corticosteroids                                                                     | 15 (21)        | 6 (17)          | 9 (26)        | 0.35    | 5 (14)            | 5 (29)        | 5 (26)        | 0.52    |
| Trial of inhaled bronchodilator                                                                      | 34 (48)        | 19 (53)         | 15 (43)       | 0.40    | 15 (43)           | 10 (59)       | 9 (47)        | 0.96    |

|                                                                                                |         |         |         |       |         |         |         |       |
|------------------------------------------------------------------------------------------------|---------|---------|---------|-------|---------|---------|---------|-------|
| Arterial blood gas                                                                             | 4 (6)   | 3 (8)   | 1 (3)   | 0.61* | 2 (6)   | 0 (0)   | 2 (11)  | 0.29* |
| Alpha-1 antitrypsin                                                                            | 4 (6)   | 2 (6)   | 2 (6)   | >.99* | 3 (9)   | 0 (0)   | 1 (5)   | >.99* |
| Other                                                                                          | 4 (6)   | 1 (3)   | 3 (9)   | 0.36* | 3 (9)   | 0 (0)   | 1 (5)   | >.99* |
| <b>What is the best way for you to access information to guide treatment of COPD patients?</b> |         |         |         |       |         |         |         |       |
| EHR guideline-based prompts: smartphone applications: online medical resources                 | 54 (76) | 28 (78) | 26 (74) | 0.73  | 27 (77) | 12 (71) | 15 (79) | >.99* |
| Standing orders, printed guideline summaries or other                                          | 17 (24) | 8 (22)  | 9 (26)  |       | 8 (23)  | 5 (29)  | 4 (21)  |       |

† Data are presented as n (%). Percentages may not total 100% due to rounding.

*Definition of abbreviations:* MD = Doctor of Medicine, DO = Doctor of Osteopathic Medicine, APP = Advanced Practice Providers (NP/PA/Other), NP = Nurse Practitioner, PA = Physician Assistant, GOLD = Global Initiative for Chronic Obstructive Lung Disease, ATS = American Thoracic Society, ERS = European Respiratory Society.

P-values shown for comparison between MD/DO and APP groups or between Colorado and Kansas combined vs. Other States. Chi-square tests (or \*Fisher's exact tests) were used to compare groups.

Supplementary Table 2. Assessment†

| Question                                                                      | Total Cohort   | Provider Degree |               |         | Practice Location |               |               |         |
|-------------------------------------------------------------------------------|----------------|-----------------|---------------|---------|-------------------|---------------|---------------|---------|
|                                                                               |                | MD/DO           | APP           | p-value | Colorado          | Kansas        | Other States  | p-value |
|                                                                               | N=71<br>(100%) | N=36<br>(51%)   | N=35<br>(49%) |         | N=35<br>(49%)     | N=17<br>(24%) | N=19<br>(27%) |         |
| <b>Are you satisfied with your practice's ability to:</b>                     |                |                 |               |         |                   |               |               |         |
| <b>Assess symptoms in COPD patients?</b>                                      |                |                 |               | >.99*   |                   |               |               | 0.43*   |
| Agree or strongly agree                                                       | 62 (87)        | 31 (86)         | 31 (89)       |         | 29 (83)           | 15 (88)       | 18 (95)       |         |
| Neutral/undecided, disagree, strongly disagree                                | 9 (13)         | 5 (14)          | 4 (11)        |         | 6 (17)            | 2 (12)        | 1 (5)         |         |
| <b>Access spirometry for COPD patients?</b>                                   |                |                 |               | 0.41    |                   |               |               | 0.67    |
| Agree or strongly agree                                                       | 44 (62)        | 24 (67)         | 20 (57)       |         | 23 (66)           | 10 (59)       | 11 (58)       |         |
| Neutral/undecided, disagree, strongly disagree                                | 27 (38)        | 12 (33)         | 15 (43)       |         | 12 (34)           | 7 (41)        | 8 (42)        |         |
| <b>Does your practice have a spirometer?</b>                                  |                |                 |               |         |                   |               |               |         |
| Yes                                                                           | 47 (66)        | 24 (67)         | 23 (66)       | 0.93    | 29 (83)           | 9 (53)        | 9 (47)        | 0.04    |
| No                                                                            | 24 (34)        | 12 (33)         | 12 (34)       |         | 6 (17)            | 8 (47)        | 10 (53)       |         |
| <b>My practice routinely:</b>                                                 |                |                 |               |         |                   |               |               |         |
| <b>Assesses symptoms in COPD patients using the CAT or mMRC dyspnea scale</b> |                |                 |               | >.99*   |                   |               |               | >.99*   |
| Yes                                                                           | 8 (11)         | 4 (11)          | 4 (11)        |         | 3 (9)             | 3 (18)        | 2 (11)        |         |
| ..No                                                                          | 63 (89)        | 32 (89)         | 31 (89)       |         | 32 (91)           | 14 (82)       | 17 (89)       |         |
| <b>Tests COPD patients for alpha-1 antitrypsin</b>                            |                |                 |               | 0.54    |                   |               |               | 0.17    |
| Always                                                                        | 1 (1)          | 0 (0)           | 1 (3)         |         | 0 (0)             | 0 (0)         | 1 (5)         |         |
| Occasionally                                                                  | 41 (58)        | 22 (61)         | 19 (54)       |         | 19 (54)           | 13 (76)       | 9 (47)        |         |
| Never                                                                         | 29 (41)        | 14 (39)         | 15 (43)       |         | 16 (46)           | 4 (24)        | 9 (47)        |         |

† Data are presented as n (%). Percentages may not total 100% due to rounding.

*Definition of abbreviations:* MD = Doctor of Medicine, DO = Doctor of Osteopathic Medicine, APP = Advanced Practice Providers (NP/PA/Other), NP = Nurse Practitioner, PA = Physician Assistant.

P-values shown for comparison between MD/DO and APP groups or between Colorado and Kansas combined vs. Other States. Chi-square tests (or \*Fisher's exact tests) were used to compare groups.

**Supplementary Table 3. Treatment and Prevention<sup>†</sup>**

| Question                                                         | Total Cohort | Provider Degree |            |         | Practice Location |            |              |         |
|------------------------------------------------------------------|--------------|-----------------|------------|---------|-------------------|------------|--------------|---------|
|                                                                  |              | MD/DO           | APP        | p-value | Colorado          | Kansas     | Other States | p-value |
|                                                                  | N=71 (100%)  | N=36 (51%)      | N=35 (49%) |         | N=35 (49%)        | N=17 (24%) | N=19 (27%)   |         |
| <b>Are you satisfied with your practice's ability to:</b>        |              |                 |            |         |                   |            |              |         |
| <b>Deliver smoking cessation counseling to my COPD patients?</b> |              |                 |            | 0.82    |                   |            |              | 0.52    |
| Agree or strongly agree                                          | 56 (79)      | 28 (78)         | 28 (80)    |         | 29 (83)           | 13 (76)    | 14 (74)      |         |
| Neutral/undecided, disagree, strongly disagree                   | 15 (21)      | 8 (22)          | 7 (20)     |         | 6 (17)            | 4 (24)     | 5 (26)       |         |
| <b>Deliver inhaler education to my COPD patients?</b>            |              |                 |            | 0.48    |                   |            |              | 0.82    |
| Agree or strongly agree                                          | 50 (70)      | 24 (67)         | 26 (74)    |         | 28 (80)           | 9 (53)     | 13 (68)      |         |
| Neutral/undecided, disagree, strongly disagree                   | 21 (30)      | 12 (33)         | 9 (26)     |         | 7 (20)            | 8 (47)     | 6 (32)       |         |
| <b>Treat symptoms in COPD patients?</b>                          |              |                 |            | 0.74*   |                   |            |              | 0.44*   |
| Agree or strongly agree                                          | 61 (86)      | 30 (83)         | 31 (89)    |         | 32 (91)           | 14 (82)    | 15 (79)      |         |
| Neutral/undecided, disagree, strongly disagree                   | 10 (14)      | 6 (17)          | 4 (11)     |         | 3 (9)             | 3 (18)     | 4 (21)       |         |
| <b>Treat COPD exacerbations?</b>                                 |              |                 |            | 0.11*   |                   |            |              | 0.17*   |
| Agree or strongly agree                                          | 68 (96)      | 36 (100)        | 32 (91)    |         | 34 (97)           | 17 (100)   | 17 (89)      |         |
| Neutral/undecided, disagree, strongly disagree                   | 3 (4)        | 0 (0)           | 3 (9)      |         | 1 (3)             | 0 (0)      | 2 (11)       |         |
| <b>Prevent COPD exacerbations?</b>                               |              |                 |            | 0.16    |                   |            |              | 0.74    |
| Agree or strongly agree                                          | 47 (66)      | 21 (58)         | 26 (74)    |         | 25 (71)           | 10 (59)    | 12 (63)      |         |
| Neutral/undecided, disagree, strongly disagree                   | 24 (34)      | 15 (42)         | 9 (26)     |         | 10 (29)           | 7 (41)     | 7 (37)       |         |

<sup>†</sup> Data are presented as n (%). Percentages may not total 100% due to rounding.

*Definition of abbreviations:* MD = Doctor of Medicine, DO = Doctor of Osteopathic Medicine, APP = Advanced Practice Providers (NP/PA/Other), NP = Nurse Practitioner, PA = Physician Assistant.

P-values shown for comparison between MD/DO and APP groups or between Colorado and Kansas combined vs. Other States. Chi-square tests (or \*Fisher's exact tests) were used to compare groups.

**Supplementary Table 4. Access to Supportive Services<sup>†</sup>**

| Question                                       | Total Cohort   | Provider Degree |               |         | Practice Location |               |               |         |
|------------------------------------------------|----------------|-----------------|---------------|---------|-------------------|---------------|---------------|---------|
|                                                |                | MD/DO           | APP           | p-Value | Colorado          | Kansas        | Other States  | p-value |
|                                                | N=71<br>(100%) | N=36<br>(51%)   | N=35<br>(49%) |         | N=35<br>(49%)     | N=17<br>(24%) | N=19<br>(27%) |         |
| <b>My COPD patients have access to:</b>        |                |                 |               |         |                   |               |               |         |
| <b>Home oxygen if needed.</b>                  |                |                 |               | 0.27    |                   |               |               | 0.49    |
| Agree or strongly agree                        | 52 (74)        | 24 (69)         | 28 (80)       |         | 24 (69)           | 15 (88)       | 13 (68)       |         |
| Neutral/undecided, disagree, strongly disagree | 18 (26)        | 11 (31)         | 7 (20)        |         | 11 (31)           | 1 (6)         | 6 (32)        |         |
| <b>Pulmonologist for consultation.</b>         |                |                 |               | 0.40    |                   |               |               | 0.02    |
| Agree or strongly agree                        | 39 (55)        | 18 (50)         | 21 (60)       |         | 23 (66)           | 10 (59)       | 6 (32)        |         |
| Neutral/undecided, disagree, strongly disagree | 32 (45)        | 18 (50)         | 14 (40)       |         | 12 (34)           | 7 (41)        | 13 (68)       |         |
| <b>Pulmonary rehabilitation.</b>               |                |                 |               | 0.28    |                   |               |               | 0.0007  |
| Agree or strongly agree                        | 26 (37)        | 11 (31)         | 15 (43)       |         | 18 (51)           | 7 (41)        | 1 (5)         | *       |
| Neutral/undecided, disagree, strongly disagree | 45 (63)        | 25 (69)         | 20 (57)       |         | 17 (49)           | 10 (59)       | 18 (95)       |         |

<sup>†</sup> Data are presented as n (%). Percentages may not total 100% due to rounding.

*Definition of abbreviations:* MD = Doctor of Medicine, DO = Doctor of Osteopathic Medicine, APP = Advanced Practice Providers (NP/PA/Other), NP = Nurse Practitioner, PA = Physician Assistant.

P-values shown for comparison between MD/DO and APP groups or between Colorado and Kansas combined vs. Other States. Chi-square tests (or \*Fisher's exact tests) were used to compare groups.

## Rural Medical Provider COPD Survey

You have been invited to participate in a 5 minute survey about COPD.

Please complete the survey below.

Thank you!

Our goal is to learn more about the challenges rural providers face when caring for COPD patients, so that they can be better understood and more easily addressed.

Are you a rural medical provider? ☐ Yes  
☐ No

For questions 1-4 please check ALL answers that apply:

1) Which guidelines do you use in guiding COPD diagnosis and management?

- ☐ NAEP
- ☐ GOLD
- ☐ ATS/ERS
- ☐ I use them but can't remember the title
- ☐ I don't use any
- ☐ I did not know there were any

2) What barriers do you see in the diagnosis of COPD?

- ☐ Lack of specific symptoms associated with COPD
- ☐ Failure of patients to recognize and report dyspnea
- ☐ People with COPD usually have multiple chronic conditions
- ☐ Lack of knowledge and training in diagnosing COPD
- ☐ Lack of easy access to spirometry
- ☐ Lack of available treatment so diagnosis is not important
- ☐ Other

(Please provide other barriers you see in the diagnosis of COPD.)

3) What do you use to make a diagnosis of COPD?

- ☐ Smoking history (pack years)
- ☐ Smokers cough
- ☐ Dyspnea with activity
- ☐ Dyspnea at rest
- ☐ Spirometry testing

4) What diagnostic tests do you perform if you suspect COPD?

- ☐ Refer to a specialist for all assessments
- ☐ Chest X-ray
- ☐ Spirometry
- ☐ Trial of inhaled corticosteroids
- ☐ Trial of inhaled bronchodilators
- ☐ Arterial blood gases or pulse oximetry
- ☐ Alpha-1 antitrypsin deficiency screening
- ☐ Other

---

(Please provide other diagnostic tests you perform if you suspect COPD.)

---

5) What is the best way for you to access information to guide your treatment of COPD patients?

- ☐ Posted in clinics  
☐ Standing orders  
☐ EHR Guideline-based prompts  
☐ Smartphone Apps  
☐ Online medical resources  
☐ Printed guideline summaries  
☐ Other
- 

---

(Please provide other ways you access information to guide your treatment of COPD patients)

---

Please indicate your level of agreement or disagreement with the statements below:

**I am satisfied with my practice's ability to:**

6a) Access spirometry for COPD patients.

- ☐ Strongly agree  
☐ Agree  
☐ Neutral/undecided  
☐ Disagree  
☐ Strongly disagree
- 

6b) Assess symptoms in COPD patients.

- ☐ Strongly agree  
☐ Agree  
☐ Neutral/undecided  
☐ Disagree  
☐ Strongly disagree
- 

6c) Treat symptoms in COPD patients.

- ☐ Strongly agree  
☐ Agree  
☐ Neutral/undecided  
☐ Disagree  
☐ Strongly disagree
- 

6d) Deliver inhaler education to my COPD patients.

- ☐ Strongly agree  
☐ Agree  
☐ Neutral/undecided  
☐ Disagree  
☐ Strongly disagree
- 

6e) Deliver smoking cessation counseling to my COPD patients.

- ☐ Strongly agree  
☐ Agree  
☐ Neutral/undecided  
☐ Disagree  
☐ Strongly disagree
- 

6f) Prevent COPD exacerbations.

- ☐ Strongly agree  
☐ Agree  
☐ Neutral/undecided  
☐ Disagree  
☐ Strongly disagree
-

- 6g) Treat COPD exacerbations.
- ☐ Strongly agree  
☐ Agree  
☐ Neutral/undecided  
☐ Disagree  
☐ Strongly disagree

Please indicate your level of agreement or disagreement with the statements below:

**My COPD patients have:**

- 7a) Access to home oxygen therapy if needed.
- ☐ Strongly agree  
☐ Agree  
☐ Neutral/undecided  
☐ Disagree  
☐ Strongly disagree

- 7b) Access to a pulmonary rehabilitation program.
- ☐ Strongly agree  
☐ Agree  
☐ Neutral/undecided  
☐ Disagree  
☐ Strongly disagree

- 7c) Access to a pulmonologist for consultation.
- ☐ Strongly agree  
☐ Agree  
☐ Neutral/undecided  
☐ Disagree  
☐ Strongly disagree

- 8) My practice routinely tests COPD patients for alpha-1 antitrypsin deficiency.
- ☐ Never  
☐ Occasionally  
☐ Always

- 9) My practice routinely assesses symptoms in COPD patients using the COPD Assessment Test (CAT), or the modified Medical Research Council (mMRC) Dyspnea scale?
- ☐ Yes  
☐ No

About me:

- 10) Where is your practice located?
- ☐ Arizona  
☐ Colorado  
☐ Idaho  
☐ Kansas  
☐ Montana  
☐ Nebraska  
☐ Nevada  
☐ New Mexico  
☐ North Dakota  
☐ Oklahoma  
☐ South Dakota  
☐ Utah  
☐ Wyoming  
☐ Other

- Are you located in:
- ☐ Eastern Colorado  
☐ Southern Colorado  
☐ Western Colorado

---

(Please provide your practice location.)

---

11) What setting best describes your practice?

- ☐ Federally qualified health center
- ☐ Hospital or health system based
- ☐ Private
- ☐ Rural health clinic
- ☐ Other

---

(Please provide your practice setting.)

---

12) What is your highest degree?

- ☐ MD or DO
- ☐ NP
- ☐ PA
- ☐ Other

---

(Please provide your highest degree.)

---

13) My age is:

- ☐ < 30
- ☐ 30-39
- ☐ 40-49
- ☐ 50-59
- ☐ 60 or over

---

14) I have been in practice in a rural setting for:

- ☐ < 5 years
- ☐ 5 to 15 years
- ☐ 16 to 25 years
- ☐ > 25 years

---

15) How many total providers are in your practice (including MD, DO, NP or PA)?

- ☐ One
- ☐ Two
- ☐ Three
- ☐ Four
- ☐ Five
- ☐ More than Five

---

16) Does your practice have a spirometer?

- ☐ Yes
- ☐ No
